1 **Title page**

2 **Title: Associations Between Air Pollution and relative**  
3 **Leukocyte Telomere Length Among Northern Swedish**  
4 **Adults: Insights from the Betula Study**

5 **Authors: Wasif Raza<sup>1</sup>, Sara Pudas<sup>2</sup>, Katja M. Kanninen<sup>3</sup>, Erin Flanagan<sup>4</sup>, Sofie**  
6 **Degerman<sup>5, 6</sup>, Rolf Adolfsson<sup>7</sup>, Rosalba Giugno<sup>8</sup>, Jan Topinka<sup>9</sup>, Xiao-wen Zeng<sup>10</sup>, Anna**  
7 **Oudin<sup>1,4\*</sup>**

8 <sup>1</sup>Department of Public Health and Clinical Medicine, Umeå University, Sweden

9 <sup>2</sup>Department of Integrative Medical Biology (IMB), Umeå University, Sweden

10 <sup>3</sup>A.I. Virtanen Institute for Molecular Sciences, University of Eastern Finland

11 <sup>4</sup>Department of Laboratory Medicine, Lund University, Sweden

12 <sup>5</sup>Department of Medical Biosciences, Umeå University, Sweden

13 <sup>6</sup>Department of Clinical Microbiology, Umeå University, Sweden

14 <sup>7</sup>Department of Clinical Sciences, Umeå University, S-90187 Umeå, Sweden

15 <sup>8</sup>Department of Computer Science, University of Verona, Italy

16 <sup>9</sup>Department of Genetic Toxicology and Epigenetics, Institute of Experimental Medicine CAS,  
17 Prague, Czech Republic

18 <sup>10</sup>Department of Preventive Medicine, School of Public Health, Sun Yat-sen University, China

19

20 Email addresses:

21 Wasif Raza: wasif.raza@umu.se

22 Sara Pudas: sara.pudas@umu.se

23 Katja M. Kanninen: katja.kanninen@uef.fi

24 Erin Flanagan: erin.flanagan@med.lu.se

25 Sofie Degerman: sofie.degerman@umu.se

26 Rolf Adolfsson: rolf.adolfsson@umu.se

27 Rosalba Giugno: rosalba.giugno@univr.it

28 Jan Topinka: jan.topinka@iem.cas.cz

29 Xiao-wen Zeng: zxw63@mail.sysu.edu.cn

30 Corresponding author: Anna Oudin, Sustainable health, Umeå University, 90187 Umeå, Sweden

31 [anna.oudin@umu.se](mailto:anna.oudin@umu.se)

32 Word count abstract: 293 Word count manuscript: 3171

33

34

35

36

37

38

39

40

41

42

43

44

45

46

47

48

49 **ABSTRACT**

50 Air pollution is increasingly discussed as a risk factor for dementia, but the biological  
51 mechanisms are not yet fully understood. Cellular integrity markers like telomere length are  
52 relevant to investigate in relation to air pollution exposure in this context, as they are associated  
53 with aging and dementia. Previous studies on air pollution and telomere length have somewhat  
54 mixed results, which may partly be due to differences in air pollution modelling, composition,  
55 and concentrations. The study aimed to investigate the relationship between source-specific air  
56 pollution exposure and telomere length in a low-level air pollution area.

57 Data were obtained from the Betula project, a longitudinal study in Northern Sweden dedicated  
58 to studying aging, memory and dementia. A total of 519 participants who were recruited  
59 between 1988 and 1995 were included, whose relative telomere length was measured, and who  
60 were followed-up with respect to dementia for more than 20 years. To estimate annual mean  
61 air pollution concentrations, a dispersion model linked to each participant's residential address  
62 was employed. We conducted linear regression to explore the associations between annual  
63 mean air pollution concentrations at participants' residences and relative leukocyte telomere  
64 length.

65 In the whole sample, there was no support for air pollution to affect telomere length, with  
66 regression slope estimates close to zero and p-values  $>0.10$ . There were tendencies for a  
67 positive association of longer telomere length and higher exposure to air pollution among  
68 individuals who were later diagnosed with dementia ( $N = 74$ ), but these findings were not  
69 conclusive (p-values  $>0.10$ ). The findings raise questions about susceptibility to air pollution  
70 and the state of the inflammatory response in individuals who later will develop dementia.

71 Given the imprecise nature of these estimates, caution is advised in their interpretation  
72 however, and validation in other studies is essential.

73

## 74 **1. Introduction**

75 Ambient (outdoor) air pollution is a major global health concern (1). The World Health  
76 Organization (WHO) estimates that ambient air pollution causes 3.5 million premature deaths  
77 annually and that 99% of the world's population are currently being exposed to levels above the  
78 current air quality guidelines outlined by WHO in 2021 (2). Even at relatively low concentrations,  
79 adverse health effects of air pollution thus persist, highlighting its ongoing harm to human health  
80 (3).

81 Extensive evidence from large-scale studies and meta-analyses has demonstrated  
82 associations between exposure to ambient particulate air pollution, and the development of  
83 dementia (4). With an ageing population, dementia is now the leading cause of death in some  
84 European countries, for example the UK and Belgium. Alzheimer's disease (AD) stands as the  
85 primary cause of dementia and is characterized by various pathological features, including the  
86 buildup of amyloid- $\beta$  plaques and neurofibrillary tau tangles, which result from complex  
87 interactions among genetic and lifestyle factors (4). Given the absence of a definitive therapy for  
88 AD and other dementia disorders, it is imperative to identify biomarkers that can help predict an  
89 individual's susceptibility to the disease. Notably, air pollution, as a modifiable environmental risk  
90 factor, presents an opportunity to address the risk of dementia (4, 5). It is thus furthermore  
91 imperative to understand the role of air pollution on such potential biomarkers.

92 With the ultimate goal of preventing and better treatments for AD and other dementia  
93 disorders, a deeper understanding of the molecular-level impact of air pollution and its effects on

94 cellular biomarkers is crucial. Telomeres, the non-coding ends of chromosomes, play a pivotal role  
95 in maintaining genomic stability and integrity by safeguarding the coding genome (6). These  
96 protective caps prevent chromosome erosion and fusion, but successively shorten during DNA  
97 replication and cell division. Comprised of repeated DNA sequences and specialized proteins,  
98 telomeres form a complex structure crucial for cellular health and longevity (7). Accumulating  
99 evidence has linked shorter relative leukocyte telomere length (rLTL) with aging, AD (8), age-  
100 related diseases and mortality (9). Research indicates that telomeres undergo progressive  
101 shortening with age, but various environmental and lifestyle factors can expedite this process. The  
102 harmful effects of air pollutants are rooted in inflammation, characterized by oxidative stress and  
103 systemic inflammation, raising concerns about their potential impact on cellular integrity and aging  
104 as well as overall health. Unravelling the effects of air pollution on telomere length can thus  
105 provide insights into the underlying mechanisms through which environmental factors influence  
106 human health and disease progression.

107         According to a systematic review of 12,058 subjects from 2018, exposure to air pollution  
108 (long-term, short-term or occupational exposure) may shorten telomere length (10). In a systematic  
109 review from 2019, only four studies were deemed high enough quality for a meta-analysis  
110 however, and the meta-estimate was inconclusive (11).

111         Health effects of air pollution in general, and inflammatory effects specifically, can be  
112 expected to differ depending on the composition of air pollution, both in terms of dominating  
113 sources of local air pollutants and the proportion of pollution coming from near sources or from  
114 long distance transport. It has for example been suggested that air pollution from sources nearby  
115 is more harmful for health than regional-level air pollution (12). To date, no previous study on air  
116 pollution and telomere length has distinguished between different sources of air pollution, or

117 between local or regional air pollution. Studies in areas with low levels of air pollution and high-  
118 resolution air pollution models are furthermore lacking.

119 This study aims to address this gap by exploring the association between air pollution and  
120 rLTL in a low-level air pollution area while distinguishing between different sources of local air  
121 pollution, and between local and total air pollution (where the latter include air pollution from  
122 long-range transport).

123

## 124 **2. Material and Methods**

### 125 *2.1. Study population*

126 The Betula cohort is a longitudinal, population-based study on dementia, memory and ageing  
127 which was initiated in 1988 to investigate health and cognitive trajectories in a representative  
128 fraction of the adult and elderly population residing in Umeå county, located in the Västerbotten  
129 region of Sweden. The comprehensive recruitment process for the Betula study has been  
130 extensively detailed in previous publications (13). In summary, participants in the Betula cohort  
131 have undergone examinations up to seven different time waves (T1 to T7), spaced at five-year  
132 intervals from 1988 to 2017. Each assessment includes the administration of health-related  
133 questionnaires and examinations and cognitive evaluations. For the purposes of the present study,  
134 participants enrolled during the time periods of 1988 to 1990 (test wave 1; T1) and 1993 to 1995  
135 (test wave 2; T2) were selected. i. In the Betula cohort, diagnoses of dementia was established  
136 adjacent to each test wave to discriminate incident dementia cases from healthy individuals or  
137 individuals with cognitive impairment of non-progressive nature and to define the year of disease  
138 onset. The diagnostic procedure has previously been extensively described (14, 15).

### 139 *2.2. Relative leukocyte telomere length*

140 The relative leukocyte telomere length (rLTL) was measured by quantitative polymerase chain  
141 reaction (qPCR) in DNA from whole blood from the second test wave (T2) between 1993 and  
142 1995 for a total of 519 included participants. The method for rLTL measurement by qPCR was  
143 originally described by Cawthon in 2002 (16). In this study, this method was used with some minor  
144 modifications (17). Each sample was evaluated by Telomere (TEL) and single copy gene  
145 hemoglobin subunit beta (HBB, Gene ID:3043) PCR reactions. A TEL/HBB value were  
146 calculated using the  $2^{-\Delta Ct}$  method, in which  $\Delta Ct = \text{average } Ct_{\text{TEL}} - \text{average } Ct_{\text{HBB}}$ . The rLTL value  
147 were obtained by dividing the TEL/HBB value of each sample with the TEL/HBB value of a  
148 reference cell line (CCRF-CEM) DNA included in all runs. The rLTL values were further  
149 normalized for potential plate effects (between-run variability) by subtracting mean-centered plate  
150 effects, estimated through a mixed-effects model with age, gender, age  $\times$  gender interaction and  
151 plate as fixed effects, and individuals as a random effect.

152

### 153 *2.3. Air pollution exposure assessment*

154 The annual mean concentrations of fine particulate matter (PM<sub>2.5</sub>) and Black Carbon (BC) were  
155 computed by the Swedish Meteorological and Hydrological Institute (SMHI) (18). Local and  
156 regional emission inventories served as inputs for the national dispersion modelling system, and  
157 SMHI provided the necessary data for the Gaussian dispersion model simulations to calculate  
158 annual mean concentrations of PM<sub>2.5</sub> and BC. The model exhibited high spatial resolution, with  
159 concentrations modelled near major roads and close to smokestacks down to 35 m by 35 m.  
160 Additionally, the model incorporated emissions from industrial sources and shipping as point  
161 sources in its simulations. Emission factors for various types of vehicles were determined based  
162 on the Handbook on Emission Factors for Road Traffic, version 3.1 (19). Non-exhaust emissions,

163 which encompass road wear and some contributions from brake wear and tire emissions, were also  
164 quantified. To estimate emissions from residential wood combustion, data from inventories of  
165 individual stoves and boilers, along with information gathered from chimney sweepers and  
166 interviews regarding wood burning habits, were utilized (20). The assessment of long-range  
167 transport air pollution relied on data from rural background monitoring stations. This involved  
168 calculating the difference between the total concentrations measured at these monitoring stations  
169 and the modelled local particle concentrations at the same locations.

170 Finally, the resulting concentrations of air pollution were linked to each participant's  
171 residential address at sampling, and the modelled value of year 1990 was used as marker for long-  
172 term exposure for the participants. The six exposure variables included total concentrations of  
173 PM2.5 and BC (PM2.5\_total, BC\_total) as well as source-specific concentrations of PM2.5  
174 (PM2.5\_exhaust, PM2.5\_woodburning) and BC (BC\_exhaust, BC\_woodburning). The study area,  
175 Umeå municipality, is located in Northern Sweden, and has overall quite low levels of PM2.5,  
176 with a total level of 9.81 µg/m<sup>3</sup> in the present study (Table 1). This is below the former WHO  
177 recommended air quality guideline from 2005 of 10 µg/m<sup>3</sup>, but over the revised WHO (in 2021)  
178 air quality guideline of 5 µg/m<sup>3</sup>.

**Table 1.** Characteristics of the participants.

| Variables                  | Number of observations | Values <sup>a</sup> |
|----------------------------|------------------------|---------------------|
| Age                        | 473                    | 61.7 (14.7)         |
| Gender                     |                        |                     |
| Female                     | 251                    | 53.1                |
| Male                       | 222                    | 46.9                |
| Education level            |                        |                     |
| Compulsory                 | 158                    | 33.4                |
| High school                | 223                    | 17.4                |
| University                 | 90                     | 27.0                |
| Smoking status             |                        |                     |
| Former smoker<br>or Smoker | 224                    | 47.4                |
| Non-smoker                 | 247                    | 52.2                |



|                                    |     |             |
|------------------------------------|-----|-------------|
| <sup>b</sup> Lymphocyte proportion | 461 | 0.30 (0.08) |
| <sup>c</sup> PM2.5_total           | 473 | 9.81 (0.66) |
| <sup>d</sup> PM2.5_exhaust         | 473 | 0.24 (0.25) |
| <sup>e</sup> PM2.5_wood            | 473 | 1.24 (0.31) |
| <sup>f</sup> Black C_total         | 473 | 0.56 (0.15) |
| <sup>g</sup> BC_exhaust            | 473 | 0.11 (0.12) |
| <sup>h</sup> BC_wood               | 473 | 0.16 (0.04) |
| Dementia status                    |     |             |
| Dementia                           | 75  | 15.9        |
| No dementia                        | 398 | 84.1        |

<sup>a</sup> Values are mean (standard deviation) for continuous variables, percentage for categorical variables. <sup>b</sup> Lymphocyte proportion was calculated as lymphocyte count divided by the sum of all white blood cells count (sum of neutrophils, eosinophils, basophils, lymphocytes, and monocytes); <sup>c</sup> Total PM2.5 (particulate matter with an aerodynamic diameter of  $\leq 2.5$  micrometers, “fine” particulate matter) concentration; <sup>d</sup> Particle emission from vehicles on the road; <sup>e</sup> Particle emission from wood burning; <sup>f</sup> Total black carbon concentration; <sup>g</sup> Black carbon emission from vehicles on the road; <sup>h</sup> Black carbon emission from wood burning.

179

180

### 181 2.3. Statistical analysis

182 The calculation of blood lymphocyte proportion involved dividing the lymphocyte count by the  
 183 total count of white blood cells, which encompasses neutrophils, eosinophils, basophils,  
 184 lymphocytes, and monocytes. To mitigate the influence of age and gender-related variations,  
 185 relative leukocyte telomere length (rLTL) was residualized against the participant’s age at the time  
 186 of rLTL measurement and their gender, using a linear regression model. This yielded a residualized  
 187 telomere length, denoted as rLTL, which was then utilized to investigate the relationship between  
 188 air pollution and telomere length. We considered age, gender (female, male), lymphocyte  
 189 proportion, education level (compulsory, high school, university), and smoking status (smoker or  
 190 former smoker, non-smoker) as a potential confounding factors to be included in this study. Air  
 191 pollution exposure, rLTL as well as all potential confounders were assessed at test wave T2,  
 192 whereas dementia was assessed with follow-up to February 2022.

193 Linear regression analysis was employed to assess the impact of both total and source-specific  
194 particle concentrations on rLTL. Model 1 was an unadjusted model. Model 2 incorporated  
195 adjustments for lymphocyte proportion, age and gender. Model 3 (the main model) additionally  
196 accounted for individual-level baseline potential confounders, including education level and  
197 smoking status. Furthermore, subgroup analysis based on future dementia diagnosis (Dementia,  
198 No dementia) was carried out to evaluate whether the association between air pollution and rLTL  
199 differed depending on dementia status. Here, a linear regression model was used and a  
200 multiplicative interaction term was included in the main model between each of pollutants and  
201 dementia status to explore potential effect modification. All statistical analyses were performed  
202 using R version 3.4.8.

203 The study was approved by the ethics review authority with Dnr: 2022-04608-01 and written  
204 informed consent was given by all Betula participants. The data for the present study were accessed  
205 for research purposes on the 15<sup>th</sup> of March 2023. The researchers analysing the data did not have  
206 access to information that could identify individual participants.

207

### 208 **3. Results**

209 In the Betula study sample, 519 individuals had their rLTL measured during T2. Furthermore,  
210 residualization of rLTL against age and gender variables resulting in a refined dataset consisting of  
211 473 participants for initial analysis. Detailed characteristics of these participants can be found in  
212 Table 1.

213 The age of the participants ranged from 40 to 85 years (mean: 61.7 years, standard  
214 deviation (SD): 14.7). Among this group, 53.1% were female, 47.4% were smokers, and 27% had  
215 completed a university degree. The annual mean concentrations (SD) of total PM<sub>2.5</sub> and BC were

216 9.83 (0.64)  $\mu\text{g}/\text{m}^3$  and 0.562 (0.143)  $\mu\text{g}/\text{m}^3$ , respectively for 1990 (used as marker for long-term  
 217 exposure in the study). During the follow-up period up to 2016, 15.9% developed dementia up to  
 218 2022, and the proportion of females in the dementia group was higher (53%) than the proportion  
 219 of males (47%). The mean rLTL value exhibited variation depending upon whether participants  
 220 would later be diagnosed with dementia or not. Shorter mean rLTL values (-0.0072) were observed  
 221 among study participants who later were diagnosed with dementia than those who were not  
 222 (0.00135), however, the difference was not statistically significant (p-value= 0.61)

223 The linear associations between air pollution and residualized leukocyte telomere length  
 224 (rLTL), are presented in Table 2.

225  
 226  
 227

**Table 2.** Linear associations between pollution exposure and relative leukocyte telomere length, model coefficients ( $\beta$ ) with their 95% Confidence Intervals (CIs).

| Measures                                            | Model 1<br>(N=473)   | Model 2<br>(N=462*/461**) | Model 3<br>(N=460*/459**) |
|-----------------------------------------------------|----------------------|---------------------------|---------------------------|
| Air pollution exposure ( $\mu\text{g}/\text{m}^3$ ) | $\beta$ (95% CI)     | $\beta$ (95% CI)          | $\beta$ (95% CI)          |
| PM2.5_total                                         | 0.01 (-0.009, 0.026) | 0.01 (-0.011, 0.024)      | 0.001 (-0.011, 0.025)     |
| PM2.5_exhaust                                       | 0.03 (-0.019, 0.074) | 0.03 (-0.023, 0.072)      | 0.02 (-0.023, 0.072)      |
| PM2.5_woodburning                                   | 0.01 (-0.025, 0.049) | 0.004 (-0.33, 0.042)      | 0.001 (-0.033, 0.044)     |
| BC_total                                            | 0.04 (-0.036, 0.119) | 0.04 (-0.042, 0.116)      | 0.03 (-0.046, 0.114)      |
| BC_exhaust                                          | 0.06 (-0.039, 0.155) | 0.05 (-0.046, 0.152)      | 0.05 (-0.019, 0.042)      |
| BC_woodburning                                      | 0.13 (-0.194, 0.452) | 0.11 (-0.165, 0.432)      | 0.11 (-0.165, 0.428)      |

Model 1: Unadjusted; Model 2: Model 1 + Age, gender and lymphocyte proportion; Model\_3: Model 2 + smoking and education. \* No of observation in models with PM2.5 exposure variable. \*\* No of observation in models with BC exposure variable.

228  
 229

230 Notably, small but imprecise tendencies for rLTL to increase with air pollution exposure  
 231 were observed, especially for the BC elements. For example, higher concentrations of BC were

232 associated with longer rLTL: a 1  $\mu\text{g}/\text{m}^3$  increase in total BC was associated with a unit increase of  
 233 0.04 (95% CI:-0.046, 0.114) in rLTL in Model 3 (Table 2). The corresponding estimates for  
 234 PM2.5\_exhaust, PM2.5\_woodburning, BC\_traffic and BC\_woodburning were: 0.02 (95% CI: -  
 235 0.023, 0.072), 0.001 (95% CI: -0.033, 0.044), 0.05 (95% CI: -0.019, 0.042), and 0.11 (95% CI: -  
 236 0.221, 0.445), respectively.

237 The estimates from the subgroup analysis based on dementia status are reported in Table 3.

238  
 239

**Table 3.** Associations between air pollution and relative leukocyte telomere length stratified by dementia (Model 3, residualized model coefficients ( $\beta$ ) and p-values for interaction between pollutants and dementia status).

|                                                        | Dementia<br>(74)               | No dementia<br>(385)           |         |
|--------------------------------------------------------|--------------------------------|--------------------------------|---------|
| Air pollution exposure<br>( $\mu\text{g}/\text{m}^3$ ) | $\beta$ (p-value) <sup>a</sup> | $\beta$ (p-value) <sup>a</sup> | p-value |
| PM2.5_total                                            | 0.03 (0.26)                    | -0.002 (0.87)                  | 0.14    |
| PM2.5_exhaust                                          | 0.06 (0.14)                    | 0.004 (0.89)                   | 0.24    |
| PM2.5_woodburning                                      | 0.034 (0.48)                   | 0.0004 (0.99)                  | 0.47    |
| BC_total                                               | 0.11 (0.17)                    | 0.003 (0.96)                   | 0.20    |
| BC_exhaust                                             | 0.12 (0.13)                    | 0.001 (0.88)                   | 0.28    |
| BC_woodburning                                         | 0.41 (0.35)                    | 0.073 (0.70)                   | 0.59    |

<sup>a</sup>Adjusted for age, gender, lymphocyte proportion, smoking status and education level.

240  
 241

242 Associations between air pollution exposure and rLTL appeared to be present mainly in  
 243 study participants who later developed dementia, but all p-values are larger than 0.10, so the  
 244 results are not conclusive. The interaction terms for effect modification by dementia status were  
 245 furthermore not statistically significant.

246

247

248

249

#### 250 **4. Discussion**

251 In this study, associations between air pollution and telomere length were not evident. There were  
252 however some tendencies for telomere length to increase with exposure to ambient particles,  
253 among study participants who were later diagnosed with dementia. Overall, the results diverge  
254 from our initial hypothesis however, which anticipated air pollution to be associated with a  
255 *decreased* telomere length. The statistical precision of the estimates were low. Consequently, these  
256 findings should be interpreted cautiously and corroborated in other studies. If we speculate  
257 however, the results raises questions about susceptibility to air pollution and about the state of the  
258 inflammatory response in people who develop dementia. The idea that susceptibility to air  
259 pollution may differ between different groups in the population is not new; we have for example  
260 previously observed that associations between particulate air pollution and dementia were mainly  
261 present among study participants carrying the *APOE*  $\epsilon$ 4 allele and for those with low performance  
262 on odor identification ability in the same cohort (21).

263 Previous research on air pollution and telomere length have yielded somewhat conflicting  
264 findings although long-term exposure (10, 11). In a study using cross-sectional data on 471,808  
265 UK Biobank individuals, telomere length decreased with increases in long-term concentrations of  
266 air pollution (22). Another large study conducted on UK Biobank participants found no significant  
267 association between long-term exposure to several pollutants and telomere length however (23).  
268 Discrepancies may thus occur in the same cohort, the main difference between the two studies  
269 seem to be the air pollution modelling. In alignment with our findings, a study involving school

270 children in East London demonstrated an increase in telomere length with rising long-term  
271 concentrations of air pollution (24). Interestingly, genetic ancestry seemed to influence the  
272 associations in that study, with stronger associations being observed in black children. In the  
273 present study, associations seemed stronger in people who later developed dementia, which is also  
274 linked to genotype. In a study from Shanghai, China, on patients with diabetes mellitus, no  
275 associations between short-term levels of air pollution and telomere length was observed (25). In  
276 a heterogenous cohort of critically ill patients it was observed that long-term exposure to air  
277 pollution was positively associated with telomere length (26). The authors speculate that an  
278 interaction of air pollutant exposure and acute inflammation may activate telomerase in these  
279 patients (26).

280         The mixed findings in previous studies underscore the complexity of the relationship  
281 between air pollution and telomere length, suggesting that multiple factors may contribute to the  
282 observed results. The levels and composition of air pollution may evidently partly explain some  
283 of the discrepancies in findings. The role of short-term versus long-term exposure to air pollution  
284 is potentially influencing the results as well. In the present study, we used annual mean  
285 concentrations of air pollution as a marker for long-term exposure to air pollution. We did not have  
286 access to short-term measurements. It has been proposed that the acute, toxic effects of  
287 inflammation following short-term air pollution exposure, such as one's average daily exposure,  
288 may lead to telomere lengthening by the activation of the enzyme telomerase (27). In the present  
289 study we find it unlikely that short-term exposure would influence the results however, since we  
290 have previously seen that the correlation between short-term levels and long-term exposure is very  
291 low in the Betula study (28).

292 Another potential explanation for the disparity in results in previous studies is the realm of  
293 proinflammatory effects of air pollution and differential distribution of leukocytes in response to  
294 inflammation. Telomere measurement is conducted as a weighted average of different leukocytes  
295 subtypes and it is important to note that proportion of neutrophils in blood circulation is higher  
296 than other leukocytes subtypes and they have longer telomere length than lymphocytes (29, 30).  
297 Notably, acute inflammation is characterised by predominant accumulation of neutrophils rather  
298 than lymphocytes, thus, it is plausible to presume that inflammation as a result of air pollution  
299 exposure may cause longer telomere length due differential clonal expansion of leukocytes (27).  
300 In the present study however, we controlled for lymphocyte proportion in an attempt to control for  
301 such differential expansions. Another mechanism by which air pollution may increase the telomere  
302 length is based on inflammation related oxidative stress. Although, oxidative stress has been  
303 suggested to decrease telomere length but contrarily it may also cause an increase in telomere  
304 length by pairing up four guanine residues in the DNA strand (31). This enhances the accessibility  
305 of telomerase enzyme which eventually causes an increase in telomere length.

306 There are several strengths and limitations of the present study that should be  
307 acknowledged. One of the key strengths is the estimation of air pollution concentrations using a  
308 high-resolution dispersion model. These estimates were further refined by accounting for  
309 meteorological conditions, traffic volume (including vehicle types and speed), street width and  
310 neighbouring building heights. Additionally, this study is among the first, to our knowledge, to  
311 examine the effects of source-specific particles on telomere length. Other strengths are the detailed  
312 dementia diagnosis and the long follow-up time within the Betula study(15). There are also several  
313 limitations to consider. Firstly, telomere length measurements with qPCR are known to suffer from  
314 measurement imprecision, although qPCR is still the preferred method in epidemiological studies

315 due to its cost-effectiveness (32). There is furthermore a risk of bias or lack of precision due to  
316 self-reported covariate information. There may also be residual confounding. We adjusted for level  
317 of education, which previous research has confirmed to increase with telomere length (33), but  
318 residual confounding due to socio-economy or lifestyle factors may have biased the estimates. The  
319 generalizability of our study is furthermore limited as it focuses on a specific geographic location  
320 with relatively low air pollution levels compared to other regions worldwide. The source-specific  
321 estimates should be reasonable generalizable to other similar areas in the world, however.  
322 Additionally, our study relies on cross-sectional observational data, which makes it challenging to  
323 establish causal inferences. However, follow-up for dementia incidence was conducted  
324 longitudinally. Moreover, our previous studies in the Betula study shows high correlation between  
325 long-term exposure to air pollution and the annual mean (which was used in the present study).  
326 We, furthermore, acknowledge the possibility of selection bias, as some participants with short  
327 residual leukocyte telomere length (rLTL), which is, again, associated with aging, age-related  
328 diseases and mortality, may have died before study enrolment. This could potentially lead to an  
329 underestimation of the effect estimates between air pollution and rLTL. Given that the levels of  
330 air pollution was low and the study size was limited compared to for example the studies in the  
331 UK biobank (22, 23), the statistical power to detect associations could furthermore be too low to  
332 detect associations. The particle levels were well above the WHO guidelines for PM<sub>2.5</sub> from 2021  
333 however, and in previous studies in Betula we have been able to detect associations between air  
334 source-specific pollutants and dementia (21, 34).

335

## 336 **5. Conclusion**



337 In summary, we did not observe any clear association between air pollution and leukocyte  
338 telomere length. In people who later developed dementia, there were tendencies for air pollution  
339 to be associated with an increase in leukocyte telomere length, however. Despite established health  
340 risks associated with air pollution, its specific impact on telomere length is a complex and evolving  
341 field. Conflicting study results highlight the need for further investigation to unravel the intricacies  
342 and discrepancies, shedding light on underlying mechanisms. Future research should focus on  
343 exploring the associations between air pollution exposure and telomere length, with attention to  
344 susceptible groups and the mechanisms involved.

345

346 Acknowledgments: The authors are grateful to the Betula study participants.

347 Author Contributions: Conceptualization (AO), Formal Analysis (WR), Funding Acquisition (AO, SD, SP,  
348 PJ, KMK), Resources (AO, SD, SP, RA), Writing (WR, AO, EF, SP, SD),

349 Writing – Review & Editing (all authors).

350 Disclosure Statement: The authors declare that there are no conflicts of interest

351 Ethics and Consent: The study was approved by the ethics review authority with Dnr: 2022-04608-01 and  
352 written informed consent was given by all Betula participants.

353 Funding Information: This research was supported under the 2019 JPCO-Fund call for Personalised  
354 Medicine under the grant number, JPND2019-466-037 (ADAIR). This research has furthermore received  
355 funding from the European Union’s Horizon 2020 research and innovation programme under grant  
356 agreement No 814978 (TUBE). SP, SD and RA were furthermore supported by a grant from the  
357 Swedish Research Council (2018-01729), and SD and AO were supported by grants from the medical  
358 faculty, Umeå University.

359

360

361

362

363

364

365

## 366 6. References

- 367 1. Manisalidis I, Stavropoulou E, Stavropoulos A, Bezirtzoglou E. Environmental and health impacts  
368 of air pollution: a review. *Frontiers in public health*. 2020;8:14.
- 369 2. WHO. WHO global air quality guidelines: particulate matter (PM<sub>2.5</sub> and PM<sub>10</sub>), ozone, nitrogen  
370 dioxide, sulfur dioxide and carbon monoxide. 2021.
- 371 3. Abolhasani E, Hachinski V, Ghazaleh N, Azarpazhooh MR, Mokhber N, Martin J. Air pollution and  
372 incidence of dementia: A systematic review and meta-analysis. *Neurology*. 2023;100(2):e242-e54.
- 373 4. Livingston G, Huntley J, Sommerlad A, Ames D, Ballard C, Banerjee S, et al. Dementia prevention,  
374 intervention, and care: 2020 report of the Lancet Commission. *The Lancet*. 2020;396(10248):413-46.
- 375 5. Scheltens P, De Strooper B, Kivipelto M, Holstege H, Chételat G, Teunissen CE, et al. Alzheimer's  
376 disease. *The Lancet*. 2021;397(10284):1577-90.
- 377 6. Blackburn EH, Epel ES, Lin J. Human telomere biology: a contributory and interactive factor in  
378 aging, disease risks, and protection. *Science*. 2015;350(6265):1193-8.
- 379 7. Srinivas N, Rachakonda S, Kumar R. Telomeres and telomere length: a general overview. *Cancers*.  
380 2020;12(3):558.
- 381 8. Hackenhaar FS, Josefsson M, Adolfsson AN, Landfors M, Kauppi K, Hultdin M, et al. Short leukocyte  
382 telomeres predict 25-year Alzheimer's disease incidence in non-APOE ε4-carriers. *Alzheimer's research &*  
383 *therapy*. 2021;13(1):1-13.
- 384 9. Wang Q, Zhan Y, Pedersen NL, Fang F, Hägg S. Telomere length and all-cause mortality: a meta-  
385 analysis. *Ageing research reviews*. 2018;48:11-20.
- 386 10. Zhao B, Vo HQ, Johnston FH, Negishi K. Air pollution and telomere length: a systematic review of  
387 12,058 subjects. *Cardiovascular diagnosis and therapy*. 2018;8(4):480.
- 388 11. Miri M, Nazarzadeh M, Alahabadi A, Ehrampoush MH, Rad A, Lotfi MH, et al. Air pollution and  
389 telomere length in adults: A systematic review and meta-analysis of observational studies. *Environmental*  
390 *Pollution*. 2019;244:636-47.
- 391 12. Segersson D, Johansson C, Forsberg B. Near-Source Risk Functions for Particulate Matter Are  
392 Critical When Assessing the Health Benefits of Local Abatement Strategies. *International journal of*  
393 *environmental research and public health*. 2021;18(13):6847.
- 394 13. Nilsson L-G, Bäckman L, Erngrund K, Nyberg L, Adolfsson R, Bucht G, et al. The Betula prospective  
395 cohort study: Memory, health, and aging. *Aging, Neuropsychology, and Cognition*. 1997;4(1):1-32.
- 396 14. Boraxbekk C-J, Lundquist A, Nordin A, Nyberg L, Nilsson L-G, Adolfsson R. Free Recall Episodic  
397 Memory Performance Predicts Dementia Ten Years prior to Clinical Diagnosis: Findings from the Betula  
398 Longitudinal Study. *Dementia and Geriatric Cognitive Disorders Extra*. 2015;5(2):191-202.
- 399 15. Nyberg L, Boraxbekk C-J, Sörman DE, Hansson P, Herlitz A, Kauppi K, et al. Biological and  
400 environmental predictors of heterogeneity in neurocognitive ageing: evidence from Betula and other  
401 longitudinal studies. *Ageing Research Reviews*. 2020:101184.

- 402 16. Cawthon RM. Telomere measurement by quantitative PCR. *Nucleic acids research*.  
403 2002;30(10):e47-e.
- 404 17. Pudas S, Josefsson M, Nordin Adolfsson A, Landfors M, Kauppi K, Veng-Taasti LM, et al. Short  
405 leukocyte telomeres, but not telomere attrition rates, predict memory decline in the 20-year longitudinal  
406 betula study. *The Journals of Gerontology: Series A*. 2021;76(6):955-63.
- 407 18. Segersson D, Eneroth K, Gidhagen L, Johansson C, Omstedt G, Nylén AE, et al. Health impact of  
408 PM10, PM2.5 and black carbon exposure due to different source sectors in Stockholm, Gothenburg and  
409 Umea, Sweden. *International journal of environmental research and public health*. 2017;14(7):742.
- 410 19. Hausberger S. Emission Factors from the Model PHEM for the HBEFA Version 3. 2009.
- 411 20. Omstedt G, Forsberg B, Persson K. Wood Smoke in Västerbotten—Measurements, Calculations and  
412 Health Impact. SMHI; 2014.
- 413 21. Andersson J, Sundström A, Nordin M, Segersson D, Forsberg B, Adolfsson R, et al. PM 2.5 and  
414 Dementia in a Low Exposure Setting: The Influence of Odor Identification Ability and APOE. *Journal of*  
415 *Alzheimer's Disease*. 2023(Preprint):1-11.
- 416 22. Wu Y, Gasevic D, Wen B, Yu P, Xu R, Zhou G, et al. Association between air pollution and telomere  
417 length:: A study of 471,808 UK Biobank participants. *The Innovation Medicine*. 2023;1(2):100017.
- 418 23. Bountziouka V, Hansell AL, Nelson CP, Codd V, Samani NJ. Large-Scale Analysis of the Association  
419 between Air Pollutants and Leucocyte Telomere Length in the UK Biobank. *Environmental Health*  
420 *Perspectives*. 2023;131(2):027701.
- 421 24. Walton RT, Mudway IS, Dundas I, Marlin N, Koh LC, Aitlhadj L, et al. Air pollution, ethnicity and  
422 telomere length in east London schoolchildren: an observational study. *Environment international*.  
423 2016;96:41-7.
- 424 25. Xia Y, Chen R, Wang C, Cai J, Wang L, Zhao Z, et al. Ambient air pollution, blood mitochondrial DNA  
425 copy number and telomere length in a panel of diabetes patients. *Inhalation toxicology*. 2015;27(10):481-  
426 7.
- 427 26. Wang C, Wolters PJ, Calfee CS, Liu S, Balmes JR, Zhao Z, et al. Long-term ozone exposure is  
428 positively associated with telomere length in critically ill patients. *Environment international*.  
429 2020;141:105780.
- 430 27. Hou L, Wang S, Dou C, Zhang X, Yu Y, Zheng Y, et al. Air pollution exposure and telomere length in  
431 highly exposed subjects in Beijing, China: a repeated-measure study. *Environment international*.  
432 2012;48:71-7.
- 433 28. Andersson J, Oudin A, Nordin S, Forsberg B, Nordin M. PM2.5 exposure and olfactory functions.  
434 *International Journal of Environmental Health Research*. 2022;32(11):2484-95.
- 435 29. Fernandes SG, Dsouza R, Khattar E. External environmental agents influence telomere length and  
436 telomerase activity by modulating internal cellular processes: Implications in human aging. *Environmental*  
437 *Toxicology and Pharmacology*. 2021;85:103633.
- 438 30. Aubert G, Baerlocher GM, Vulto I, Poon SS, Lansdorp PM. Collapse of telomere homeostasis in  
439 hematopoietic cells caused by heterozygous mutations in telomerase genes. *PLoS genetics*.  
440 2012;8(5):e1002696.
- 441 31. Lee H-T, Bose A, Lee C-Y, Opresko PL, Myong S. Molecular mechanisms by which oxidative DNA  
442 damage promotes telomerase activity. *Nucleic acids research*. 2017;45(20):11752-65.
- 443 32. Verhulst S, Susser E, Factor-Litvak PR, Simons MJ, Benetos A, Steenstrup T, et al. Commentary:  
444 The reliability of telomere length measurements. *International journal of epidemiology*. 2015;44(5):1683-  
445 6.
- 446 33. Amin V, Fletcher JM, Sun Z, Lu Q. Higher educational attainment is associated with longer  
447 telomeres in midlife: Evidence from sibling comparisons in the UK Biobank. *SSM-Population Health*.  
448 2022;17:101018.

449 34. Oudin A, Segersson D, Adolfsson R, Forsberg B. Association between air pollution from residential  
450 wood burning and dementia incidence in a longitudinal study in Northern Sweden. PloS one.  
451 2018;13(6):e0198283.

452

453

454

455

456

457

458

459

460

461

462

463
